# Supplementary material for: Palladium-catalyzed carbopalladation and carbocyclization of arynes with aryl halides: a highly efficient route to functionalized triphenylenes
Source: Royal Society of Chemistry journal article supplement (doi:10.1039/b515846j), 2006-01-01

# Supporting Information

## **Palladium-catalyzed carbopalladation and carbocyclization of arynes with aryl halides: a highly efficient route to functionalized triphenylenes**

Thiruvellore Thatai Jayanth and Chien-Hong Cheng\*

Department of Chemistry, National Tsing Hua University, Hsinchu 30013 Taiwan

### **Table of Contents**

|               |                                              |
|---------------|----------------------------------------------|
| Page S2       | Experimental Section                         |
| Page S3 – S5  | $^1\text{H}$ and $^{13}\text{C}$ NMR Data    |
| Page S6 – S21 | $^1\text{H}$ and $^{13}\text{C}$ NMR Spectra |

## Experimental Section

**General:** All reactions were conducted under nitrogen atmosphere on a dual-manifold Schlenk line unless otherwise mentioned and in oven-dried glass wares. Acetonitrile was dried with CaH<sub>2</sub> and distilled prior to use. Benzyne precursors **1a-c** were synthesized according to the literature procedures.<sup>1</sup> Pd(dba)<sub>2</sub> was prepared by reported procedure.<sup>2</sup> Other reagents were commercially available and used as purchased.

**General Procedure for the Synthesis of Triphenylenes (3):** To a solution of Pd(dba)<sub>2</sub> (0.0150 mmol), CsF (2.40 mmol), Tl(OAc) (0.36 mmol) and aryl iodide(**2**) (0.30 mmol) under one atmosphere of nitrogen was added benzyne precursor (**1**) (0.60 mmol) and CH<sub>3</sub>CN (3.0 mL) via syringes. The reaction mixture was allowed to stir at 85 °C for 8 h. At the end of the reaction, the reaction mixture was diluted with CH<sub>2</sub>Cl<sub>2</sub>, filtered through Celite and silica gel. The filtrate was concentrated and the residue was purified through a silica gel column using hexane as eluent to give pure **3**.

Compounds **3a-h**, were prepared by following this procedure. Spectral data of **3a-h** are listed below:

### References:

- 1 (a) Y. Himeshima, T. Sonoda and Kobayashi, H. *Chem. Lett.* 1983, 1211; (b) D. Peña, D. Pérez, E. Guitián. and L.Castedo, *J. Am. Chem. Soc.* 1999, **121**, 5827.
- 2 Y. Takahashi, T. Ito, S. Sakai and Y. Ishii, *J. Chem. Soc., Chem. Commun.* 1970, 1065.

**1-(Triphenylen-6-yl)ethanone (3a):** white solid, mp 152-153 °C;  $^1\text{H NMR}$  (600 MHz,  $\text{CDCl}_3$ ):  $\delta$  2.70 (s, 3H), 7.59-7.63 (m, 4H), 8.01 (dd,  $J = 8.5$ ,  $J = 1.7$ , 1H), 8.46-8.58 (m, 5H), 9.07 (s, 1H);  $^{13}\text{C NMR}$  (150 MHz,  $\text{CDCl}_3$ ):  $\delta$  26.7, 123.18, 123.20, 123.3, 123.4; 123.8, 123.9, 126.0, 127.3, 127.4, 127.6, 128.2, 128.7, 129.3, 129.3, 129.7, 130.5 133.1, 134.9, 197.9; **HRMS** calcd for  $\text{C}_{20}\text{H}_{14}\text{O}$  270.1045, found 270.1051. **Registry Number:** [74733-00-9]

**Ethyl triphenylene-2-carboxylate (3b):** white solid, mp 129-130 °C;  $^1\text{H NMR}$  (400 MHz,  $\text{CDCl}_3$ ):  $\delta$  1.48 (t,  $J = 7.2$  Hz, 3H), 4.48 (q,  $J = 14.4$  Hz,  $J = 7.2$  Hz, 2H), 7.64-7.70 (m, 4H), 8.23 (dd,  $J = 8.8$  Hz,  $J = 2.0$  Hz, 1H), 8.60-8.64 (m, 4H), 8.70-8.72 (m, 1H); 9.33 (s, 1H);  $^{13}\text{C NMR}$  (100 MHz,  $\text{CDCl}_3$ ):  $\delta$  14.4, 61.13, 123.2 (2C), 123.3(2C), 123.5, 125.3, 127.2, 127.3, 127.4, 127.6, 128.1, 128.7, 128.9, 129.4, 129.8, 130.6, 133.0, 166.7; **HRMS** calcd for  $\text{C}_{21}\text{H}_{16}\text{O}_2$  300.1150, found 300.1146. **Registry Number:** [34177-32-7]

**2-Nitrotriphenylene (3c):** yellow solid, mp 162-163 °C;  $^1\text{H NMR}$  (600 MHz,  $\text{CDCl}_3$ ):  $\delta$  7.60 (m, 4H), 8.19 (d,  $J = 6.3$  Hz, 1H), 8.39-8.43 (m, 3H), 8.50 (t,  $J = 9.6$  Hz, 2H), 9.19 (s, 1H);  $^{13}\text{C NMR}$  (150 MHz,  $\text{CDCl}_3$ ):  $\delta$  118.8, 120.6, 123.2, 123.31, 123.32, 124.0, 124.1, 127.6, 127.7, 127.9, 128.3, 128.4, 129.0, 129.7, 129.9, 130.7, 134.0, 146.1; **HRMS** calcd for  $\text{C}_{18}\text{H}_{11}\text{NO}_2$  273.0790, found 273.0792. **Registry Number:** [81316-79-2]

**1-(2,3,6,7-Tetramethyltriphenylen-11-yl)ethanone (3d):** white solid, mp 236-237 °C;  $^1\text{H NMR}$  (400 MHz,  $\text{CDCl}_3$ ):  $\delta$  2.76 (s, 3H), 2.50-2.49 (m, 12H), 8.07 (dd,  $J = 8.8$  Hz,  $J = 2.0$  Hz, 1H), 8.30-8.31 (m, 3H), 8.58 (d,  $J = 4.0$  Hz, 2H), 9.16 (s, 1H);  $^{13}\text{C NMR}$  (100 MHz,  $\text{CDCl}_3$ ):  $\delta$  20.2, 20.26, 20.33, 26.8, 29.7, 123.2, 123.6, 123.7, (2C), 123.8, 124.5,

125.5, 126.7, 127.4, 127.9, 128.9, 129.1, 133.1, 134.7, 135.8, 136.0, 136.6, 137.4, 198.2;

**HRMS** calcd for C<sub>24</sub>H<sub>22</sub>O 326.1671, found 326.1675.

**10-Fluoro-2,3,6,7-tetramethyltriphenylene (3e)**: white solid, mp 202-203 °C; **<sup>1</sup>H NMR** (400 MHz, CDCl<sub>3</sub>): δ 2.26 (s, 6H), 2.47 (s, 6H), 7.29-7.24 (m, 1H), 8.14-8.12 (m, 2H), 8.15 (s, 1H), 8.26 (s, 2H), 8.51-8.47 (m, 1H); **<sup>13</sup>C NMR** (100 MHz, CDCl<sub>3</sub>): δ 20.2, 108.3 (d), 114.5 (d), 123.6 (2C), 123.9, 125.0, 125.1, 125.9, 126.8, 127.2, 127.3, 128.2, 131.3, 131.4, 135.6, 135.7, 136.6, 162.0 (d); **HRMS** calcd for C<sub>22</sub>H<sub>19</sub>F 302.1471, found 302.1468.

**2,3,6,7-Tetramethyltriphenylene (3f)**: white solid, mp 199-200 °C; **<sup>1</sup>H NMR** (600 MHz, CDCl<sub>3</sub>): δ 2.49-2.50 (m, 12H), 7.57 - 7.59 (m, 2H), 8.34 (d, *J* = 10.2 Hz, 4H), 8.57 - 8.59 (m, 2H); **<sup>13</sup>C NMR** (100 MHz, CDCl<sub>3</sub>): δ 20.2, 123.0, 123.6, 123.8, 126.4, 127.6, 127.9, 129.5, 135.5, 136.0; **HRMS** calcd for C<sub>22</sub>H<sub>20</sub> 284.1565, found 284.1567.

**1-(1,2,3,10,11,12-Hexahydrodicyclopenta[*b,h*]triphenylene-6-yl)-1-ethanone (3g)**: white solid, mp 281-282 °C; **<sup>1</sup>H NMR** (400MHz, CDCl<sub>3</sub>): δ 2.18-2.22 (m, 4H), 2.76 (s, 3H), 3.10-3.16 (m, 8H), 8.07 (d, *J* = 8.4Hz, 1H), 8.43 (s, 3H), 8.50 (s, 1H), 8.59 (d, *J* = 8.8 Hz, 1H), 9.12 (s, 1H); **<sup>13</sup>C NMR** (100 MHz, CDCl<sub>3</sub>): δ 25.8 (2C), 26.8, 32.9, 33.0 (2C), 33.1, 118.3, 118.4, 118.5, 119.0, 123.4, 123.9, 125.5, 127.3, 127.9, 129.1, 129.5, 130.0, 133.5, 134.5, 143.8, 143.9, 144.7, 145.4, 198.2; **HRMS** calcd for C<sub>26</sub>H<sub>22</sub>O 350.1671, found 350.1677.

**Ethyl 1,2,3,10,11,12-hexahydrodicyclopenta[*b,h*]triphenylene-6-carboxylate (3h)**: white solid, mp 253-255 °C; **<sup>1</sup>H NMR** (400MHz, CDCl<sub>3</sub>): δ 1.49 (t, *J* = 7.2 Hz, 3H), 2.15-2.26 (m, 4H), 3.06-3.13 (m, 8H), 4.49 (q, *J* = 14.4 Hz, *J* = 7.2 Hz, 2H), 8.12 (dd, *J* =

8.8 Hz, 1H), 8.33 (s, 3H), 8.44 (s, 1H), 8.50 (d,  $J = 8.8$  Hz, 1H), 9.22 (s, 1H);  $^{13}\text{C}$  NMR (100 MHz,  $\text{CDCl}_3$ ):  $\delta$  14.5, 25.7 (2C), 32.8, 32.88, 32.97, 33.0, 61.0, 118.1, 118.2, 118.4, 118.8, 123.0, 125.1, 126.3, 127.3, 127.7, 127.8, 128.9, 129.4, 129.8, 133.2, 143.5, 143.7, 144.3, 145.0, 167.0; **HRMS** calcd for  $\text{C}_{27}\text{H}_{24}\text{O}_2$  380.1776, found 380.1772.

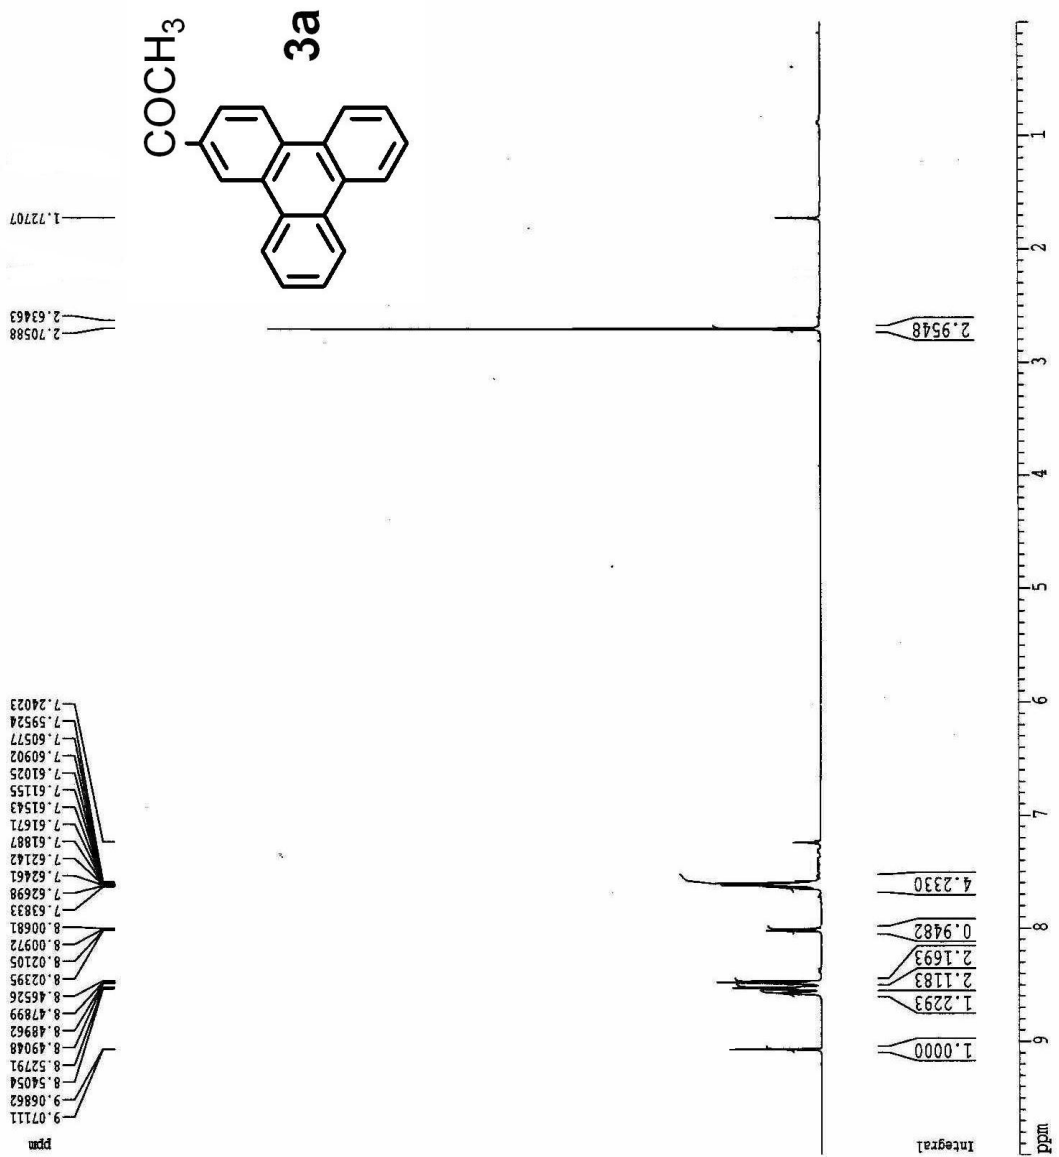

```

Current Data Parameters
NAME      J2-165AA
EXPNO    1
PROCNO   1

F2 - Acquisition Parameters
Date_    200511025
Time     21.30
INSTRUM spect
PROBHD   5 mm QNP 1H/1
PULPROG zg
TD        32768
SOLVENT  CDCl3
NS        16
DS        0
SWH       9615.385 Hz
FIDRES    0.281438 Hz
AQ         1.7039860 sec
RG         32
AQ         52.000 usec
DE         6.50 usec
TE         295.1 K
DL         1.0000000 sec
MCREST    0.0000000 sec
MCORRK    0.01500000 sec

***** CHANNEL f1 *****
NUC1      1H
P1        10.00 usec
PL1       4.00 dB
SFO1      599.5035970 MHz

F2 - Processing parameters
SI        32768
SF        599.5000272 MHz
WDW       no
SSB       0
LB        0.00 Hz
GB        0
PC        1.00

1D NMR plot parameters
CX        20.00 cm
CY        10.00 cm
F1P       10.000 ppm
F1        5995.00 Hz
F2P       0.000 ppm
F2        0.00 Hz
PPMCM     0.50000 ppm/cm
HZCM      299.75000 Hz/cm

```

Current Data Parameters  
NAME JZ-165AA  
EXPNO 2  
PROCNO 1  
F2 - Acquisition Parameters  
Date\_ 20051025  
Time 21:28  
Date\_ 20051025  
Time 21:28  
PROCNO 5  
PROCNAME JZ-165AA  
PULPROG zgpg30  
TD 65536  
SOLVENT CDCl3  
SI 0  
SF 400.1464000  
WDW EM  
SSB 0  
AQ 1.374666 Hz  
FIDRES 0.337748 sec  
RG 327.88  
AQ 11.100 usec  
DE 6.50 usec  
TE 299.1 K  
D1 3.0000000 sec  
d11 0.0000000 sec  
d12 0.0000000 sec  
DELTA 0.0000000 sec  
INSTR1 spect  
NUC1 13C  
NUC2 13C  
P1 4.50 usec  
P11 0.00 dB  
SFO1 150.7697699 MHz  
===== CHANNEL f2 =====  
CPDPRG2 waltz16  
NUC1 1H  
P1 13.00 usec  
P12 130.00 dB  
P13 14.00 dB  
SFO2 599.5023975 MHz  
F2 - Processing parameters  
SI 0  
SF 150.744698 MHz  
WDW EM  
SSB 0  
AQ 1.00 Hz  
DE 0  
TE 299.1 K  
D1 3.0000000 sec  
d11 0.0000000 sec  
d12 0.0000000 sec  
DELTA 0.0000000 sec  
INSTR1 spect  
===== CHANNEL f1 =====  
CPDPRG1 zgpg30  
SI 0  
SF 400.1464000 MHz  
WDW EM  
SSB 0  
AQ 1.00 Hz  
DE 0  
TE 299.1 K  
D1 3.0000000 sec  
d11 0.0000000 sec  
d12 0.0000000 sec  
DELTA 0.0000000 sec  
INSTR1 spect  
===== CHANNEL f2 =====  
CPDPRG2 waltz16  
SI 0  
SF 599.5023975 MHz  
WDW EM  
SSB 0  
AQ 1.00 Hz  
DE 0  
TE 299.1 K  
D1 3.0000000 sec  
d11 0.0000000 sec  
d12 0.0000000 sec  
DELTA 0.0000000 sec  
INSTR1 spect  
===== CHANNEL f1 =====  
CPDPRG1 zgpg30  
SI 0  
SF 400.1464000 MHz  
WDW EM  
SSB 0  
AQ 1.00 Hz  
DE 0  
TE 299.1 K  
D1 3.0000000 sec  
d11 0.0000000 sec  
d12 0.0000000 sec  
DELTA 0.0000000 sec  
INSTR1 spect  
===== CHANNEL f2 =====  
CPDPRG2 waltz16  
SI 0  
SF 599.5023975 MHz  
WDW EM  
SSB 0  
AQ 1.00 Hz  
DE 0  
TE 299.1 K  
D1 3.0000000 sec  
d11 0.0000000 sec  
d12 0.0000000 sec  
DELTA 0.0000000 sec  
INSTR1 spect

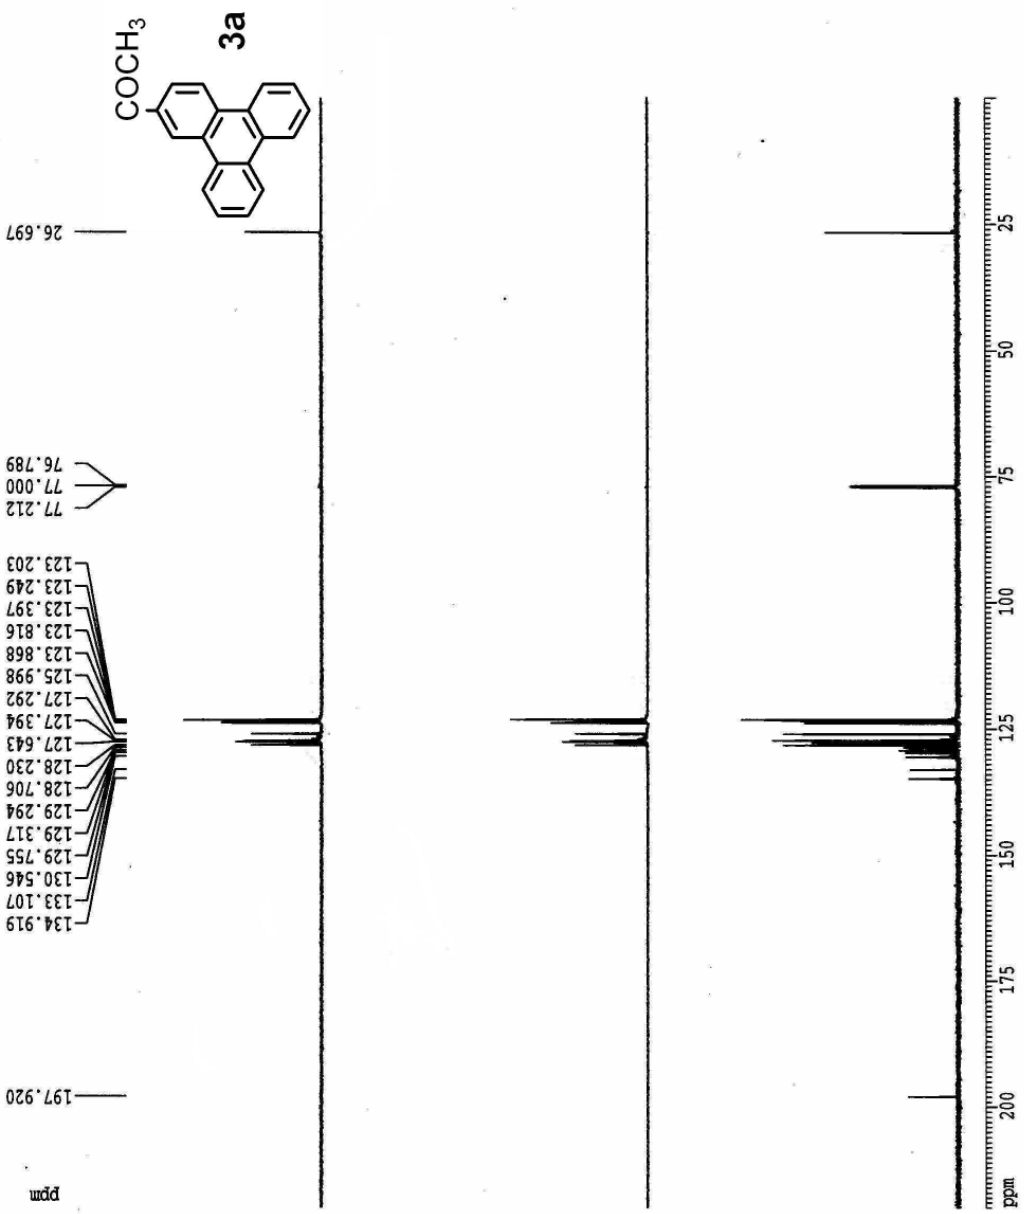

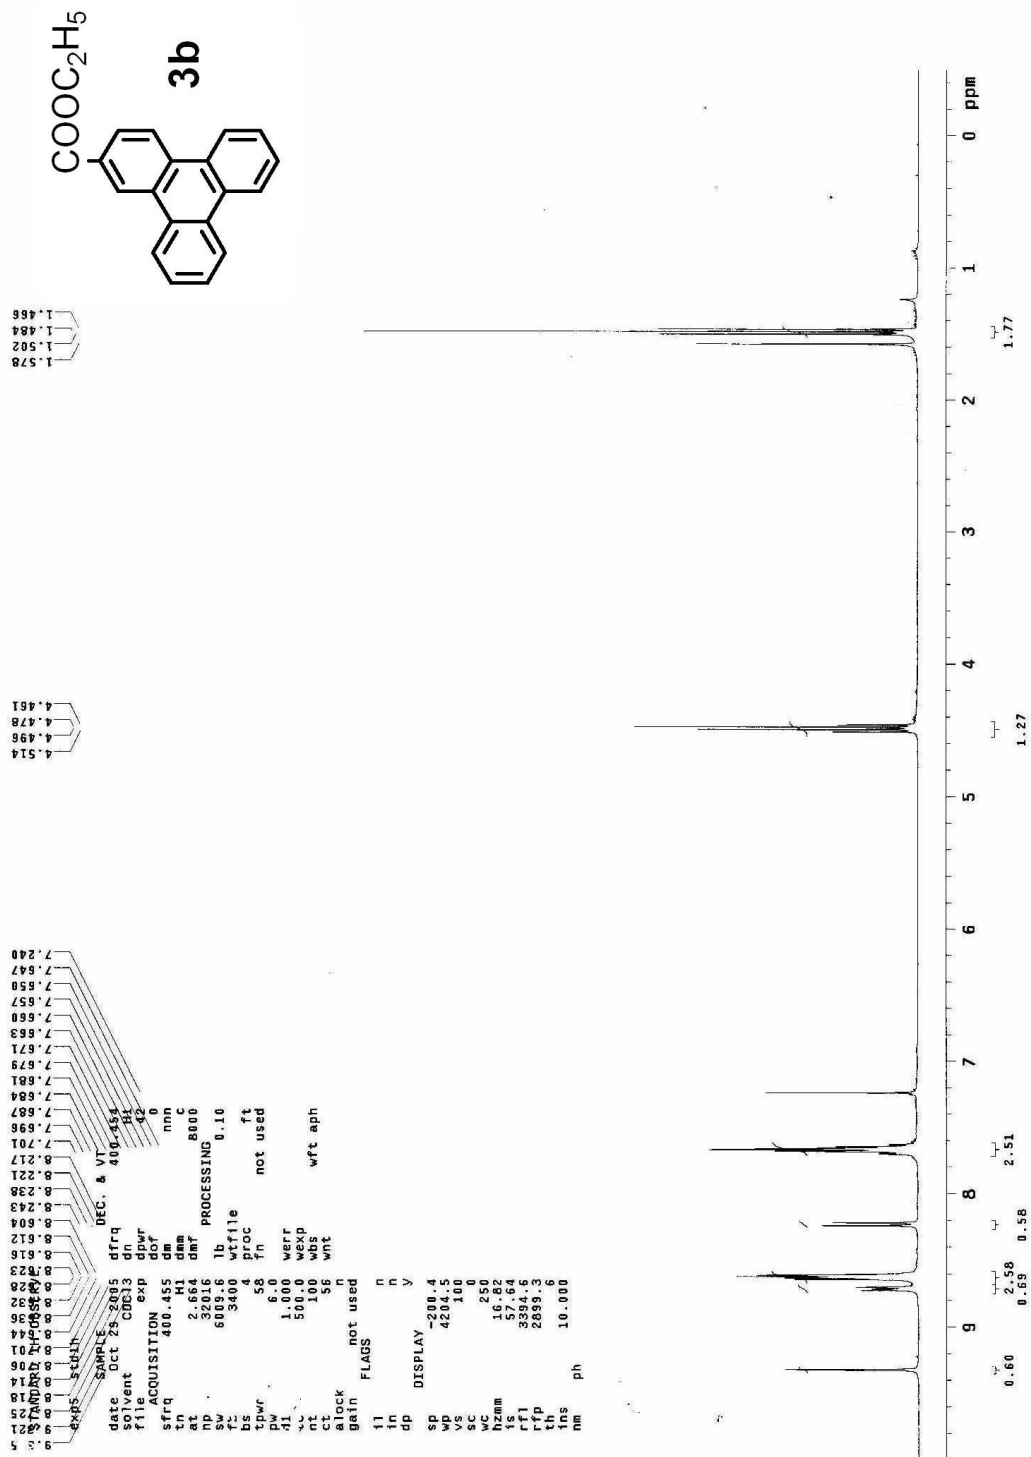



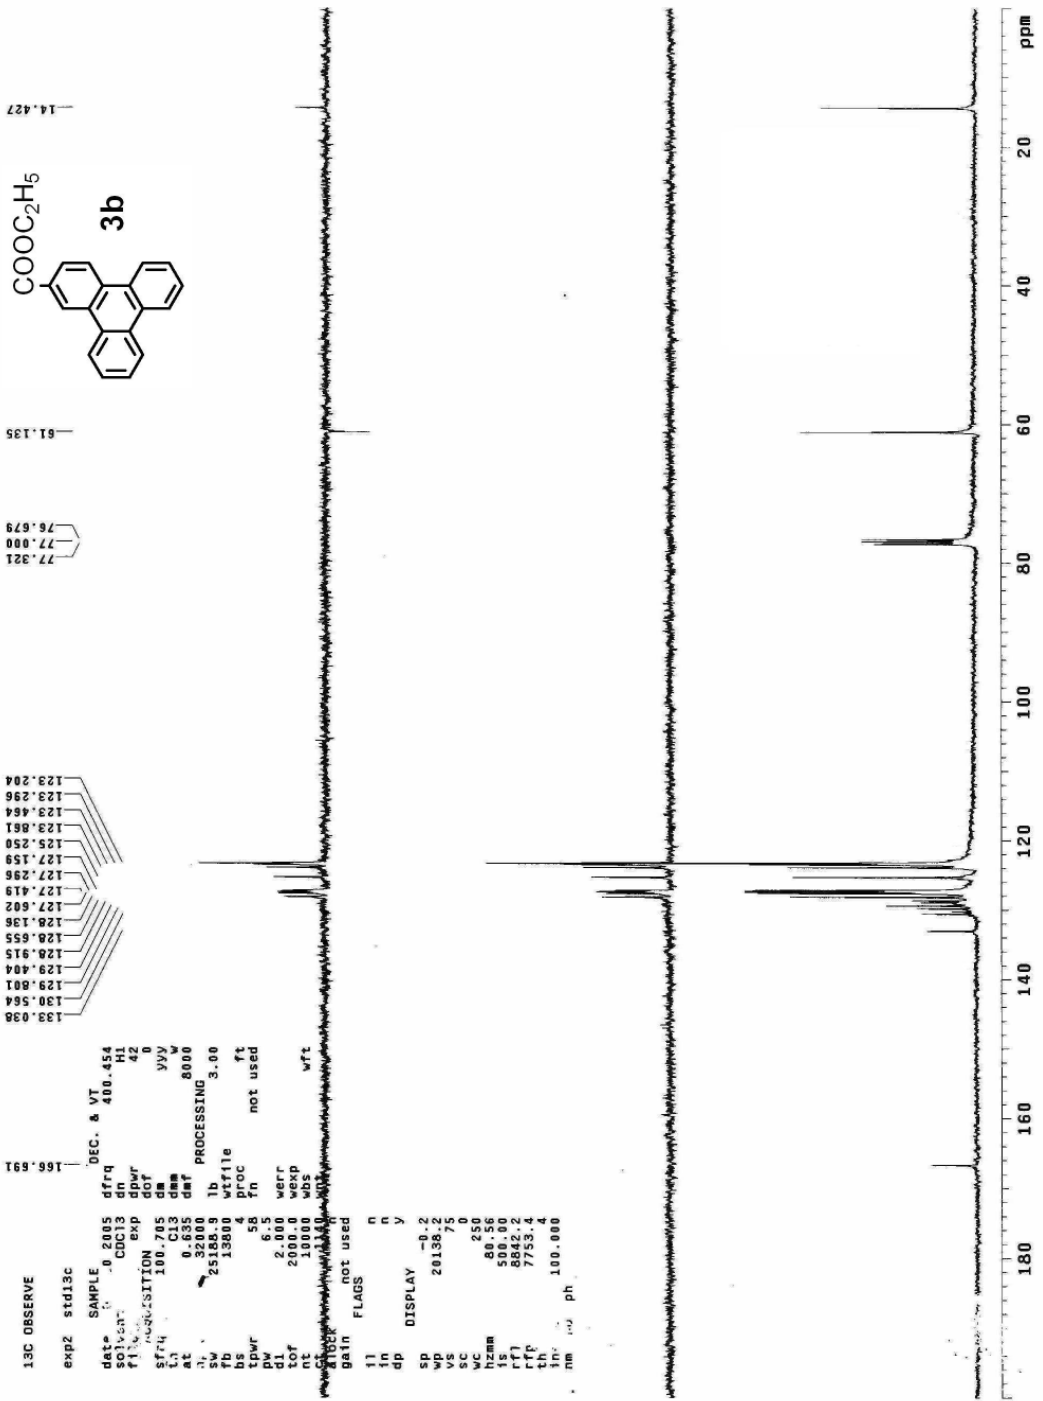

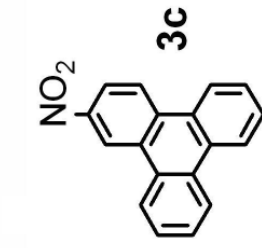

1.5681

7.24001  
7.60043  
7.60158  
7.61354  
7.62582  
7.62901  
7.63175  
7.64502  
7.65673  
7.66635  
7.67958  
7.69144  
8.18520  
8.18952  
8.20016  
8.39884  
8.41421  
8.42544  
8.43495  
8.48763  
8.50157  
8.51605  
8.51847  
9.19186  
ppm

```

Current Data Parameters
NAME      UZ-166AA
EXPNO     1
PROCNO    1

F2 - Acquisition Parameters
Date_     20051026
Time      20.25
INSTRUM   spect
PROBHD    5 mm QNP 1H/1
PULPROG   zgpg30
TD         32768
SOLVENT   CDCl3
NS         16
DS         4
SWH        9615.385 Hz
FIDRES     0.293438 Hz
AQ         1.7039660 sec
RG         32
LW         52.000 usec
DE         6.50 usec
TE         298.2 K
D1         1.0000000 sec
dCREST    0.0000000 sec
PCPRG2    0.0150000 sec

***** CHANNEL f1 *****
NUC1       1H
P1         10.00 usec
PL1        4.00 dB
SFO1       500.1325970 MHz

F2 - Processing parameters
SI         32768
SF         500.1325970 MHz
WDW        no
SSB        0
LB         0.00 Hz
GB         0
PC         1.00

1D NMR plot parameters
CX         20.00 cm
CY         10.00 cm
F1F        10.000 ppm
F2F        5995.00 Hz
F2P        -0.500 ppm
PPMCM      0.52500 ppm/cm
HZCM       314.73749 Hz/cm
  
```

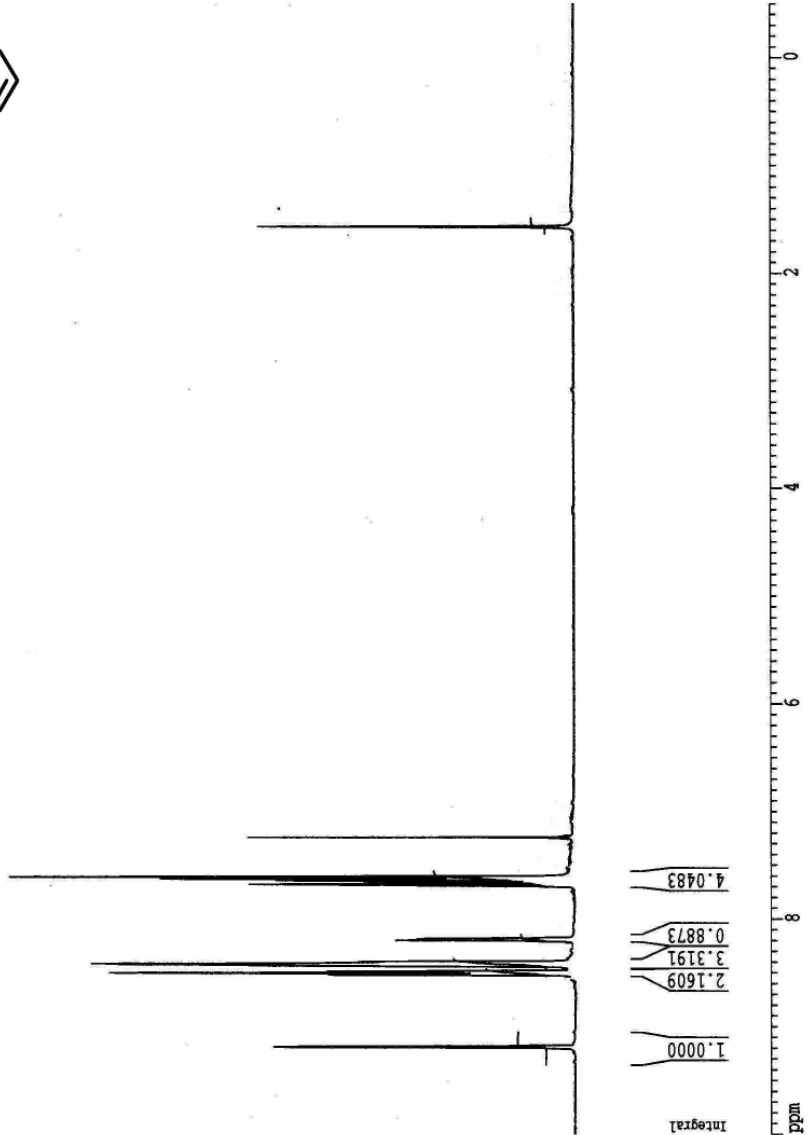

```

Current Data Parameters
NAME      J2-160A
PROCNO    1
=====
F2 - Acquisition Parameters
Date_     20051028
Time      13:42
INSTRUM   spect
PROBHD    5 mm QNP 1H/1
PULPROG   zgpg30
TD        32768
SOLVENT   CDCl3
NS        314
DS        0
SHE       45045.047 Hz
FIDRES    1.1774668 Hz
AQ         0.3077748 sec
RG         1324
EM         11.100 usec
DE         6.50 usec
TE        298.2 K
T1         3.0000000 sec
d11        0.0000000 sec
DELTA     2.8000010 sec
INSTRUM   spect
NUC1       13C
MCHUNK    0.0150000 sec
===== CHANNEL F1 =====
NUC1       13C
P1         4.50 usec
PL         0.00 dB
SFO1      150.7607619 MHz
===== CHANNEL F2 =====
CPDPRG2   waltz16
NUC2       13C
PCPD2     91.00 usec
PL2        1.00 dB
PL12       11.30 dB
PL13       14.00 dB
SFO2      599.5023975 MHz
F2 - Processing parameters
SI         32768
SF         150.7644043 MHz
WDW        EM
SSB        0
LB         1.00 Hz
GB         0
PC         0.50
=====
1D NMR plot parameters
SI         32768
SF         150.7644043 MHz
AQ         0.3077748 sec
RG         1324
EM         11.100 usec
DE         6.50 usec
TE        298.2 K
T1         3.0000000 sec
d11        0.0000000 sec
DELTA     2.8000010 sec
INSTRUM   spect
NUC1       13C
MCHUNK    0.0150000 sec
=====

```

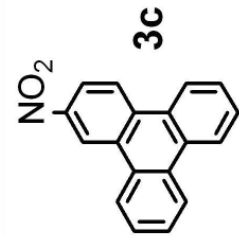

146.089  
134.019  
130.765  
129.890  
129.664  
129.000  
128.396  
128.372  
127.866  
127.703  
127.584  
124.134  
124.026  
123.324  
123.310  
123.208  
120.608  
118.823

ppm

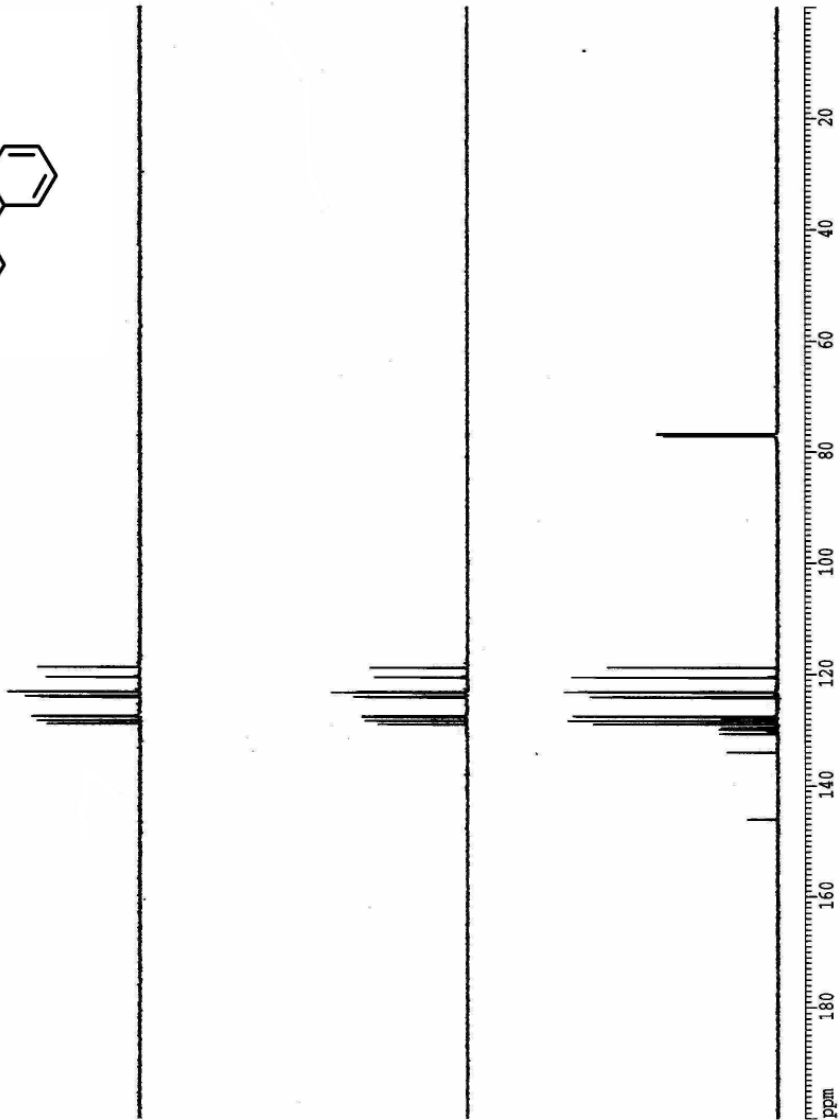

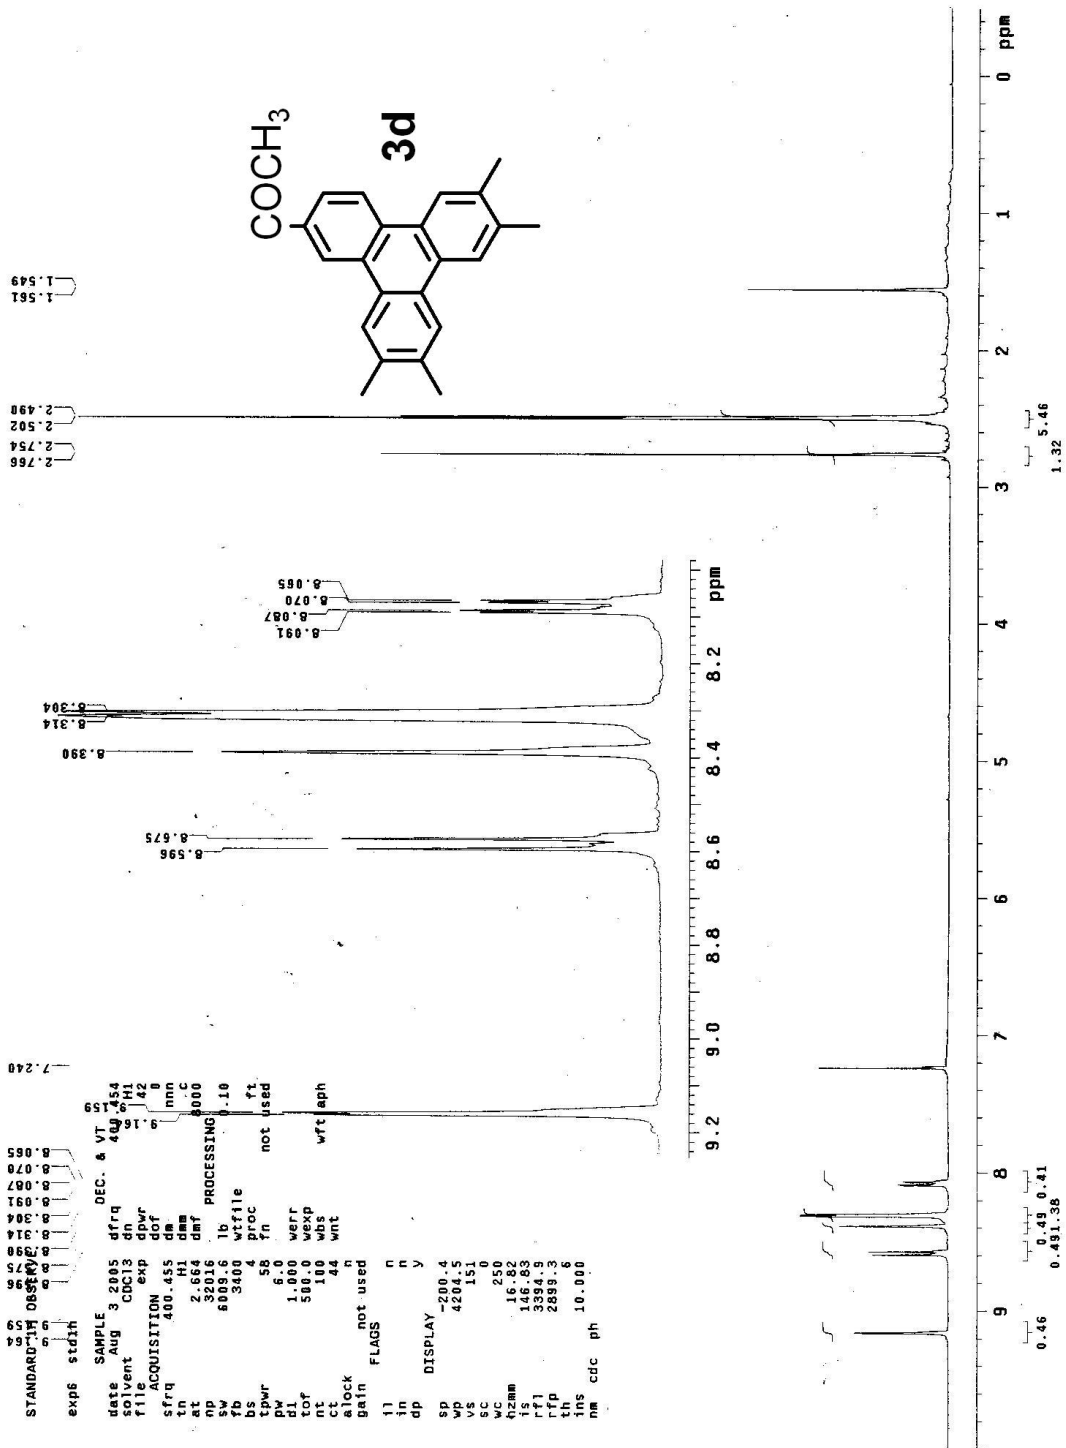

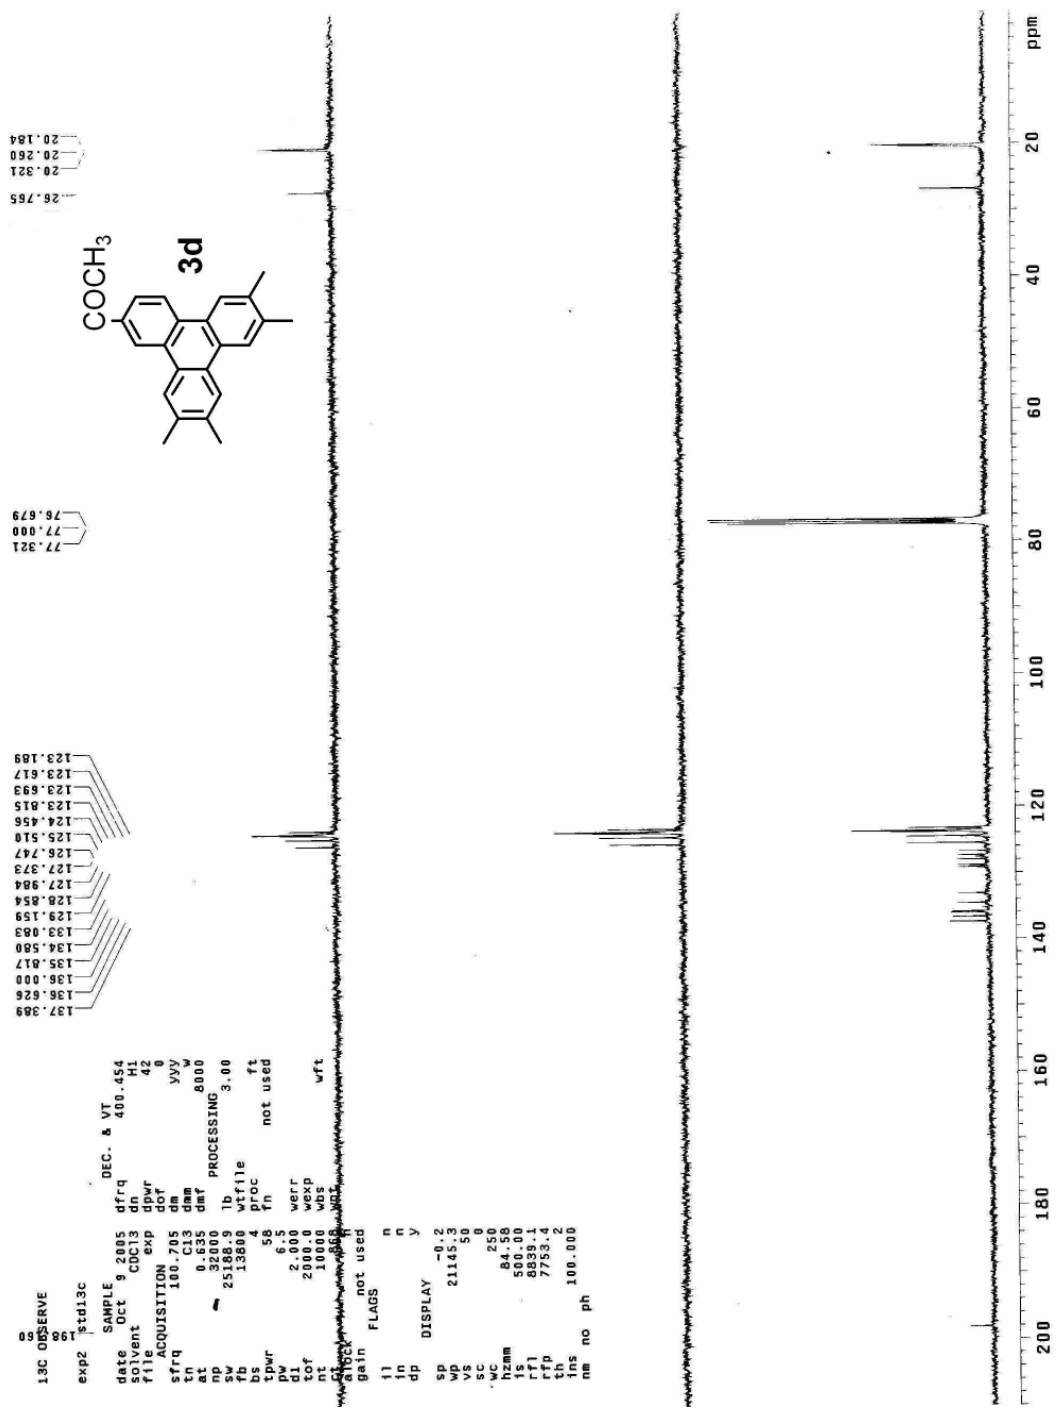

```

3a exp2 stdib:
date Sep 1 2005 dfrq DEC. & VT
solvent CDC13 dn H1 400.454
file ACQUISITION exp ddr 46
sfrq 400.455 da nmh
tn H1 dnm c
at 2.664 dmf 8000
sw 32016 lb PROCESSING 0.10
fd 3400 wrfile
tsproc 58 ft
tspur 6.0 not used
dl 1.000 werr
tof 500.0 wexp wft eph
nt 100 wps
ct 28 wnt
alock not used
gain FLAGS
ll n
ln n
dp n y
SP DISPLAY-200.4
wv 4204.5
vs 151
sc 0
wc 250
hzmm 16.82
ls 52.56
rfi 2835.3
th 2835.4
ins 10.000
nm cdc ph

```

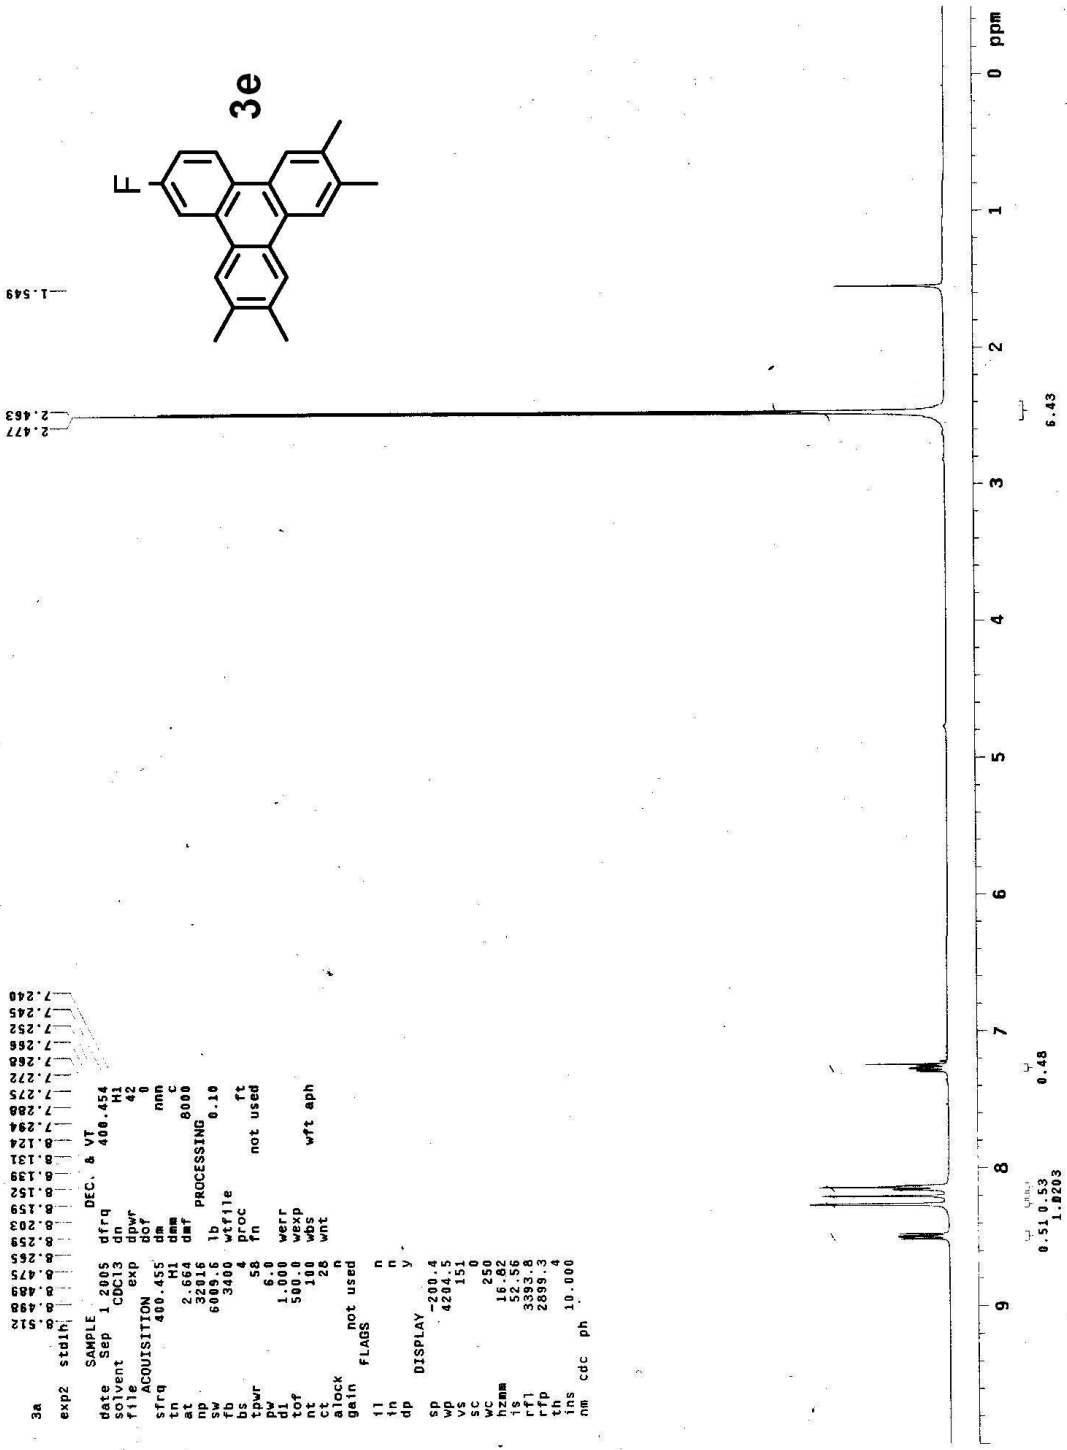

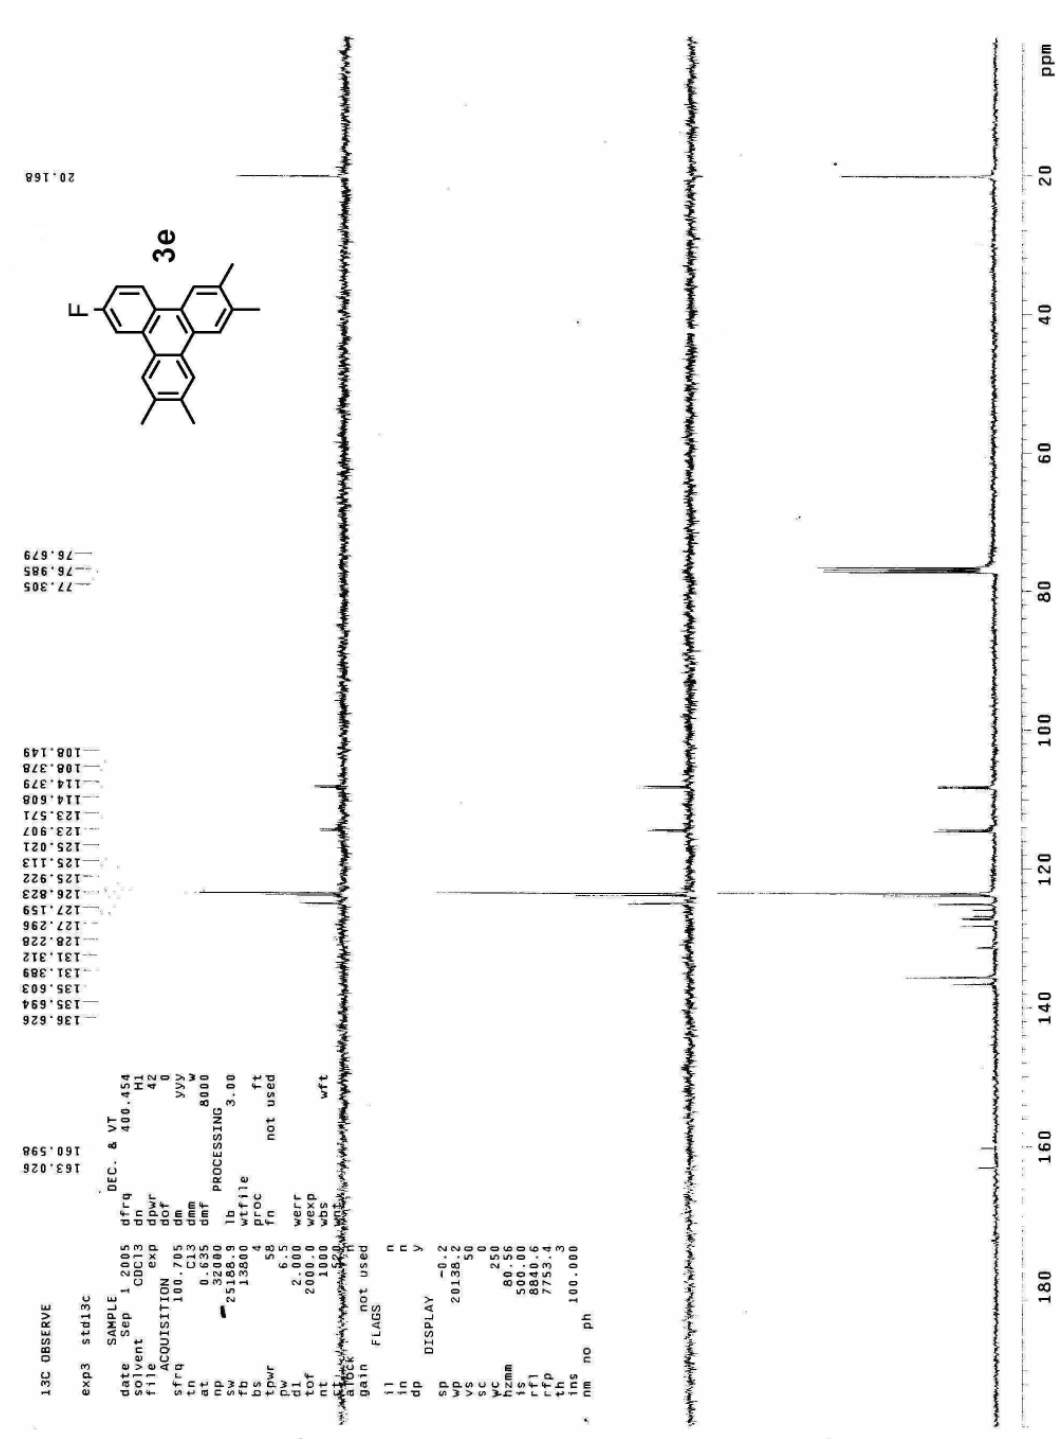

20.168

77.305  
76.879

108.149  
108.378  
114.379  
114.608  
123.571  
123.907  
125.021  
125.113  
125.922  
126.823  
127.159  
127.296  
128.228  
131.312  
131.389  
135.694  
136.826

163.026  
160.598

13C OBSERVE  
exp3 std13c

date Sep 1 2005 DEC. & VT  
solvent CDCl3 dn 400.454  
file exp dpr 42  
ACQUISITION exp dof 0  
sfrq 100.705 dm yvy  
at 0.635 gmf 8000  
np 32000 lb  
sw 25188.9 wf file 3.00  
ds 13800 w file  
pwr 58 proc  
flv 6.5 fn not used  
dl 2.000 werr  
tof 2000.0 wexp  
nt 1000 wbs  
wft

BAIR FLAGS  
not used

ll n n  
in n n  
dp DISPLAY y  
sp DISPLAY -0.2  
wp 20138.2  
vs 50  
sc 0  
pc 250  
ic 80.500  
ls 500.00  
rf1 8840.6  
rfp 7753.4  
th  
ins no ph  
ms 100.000

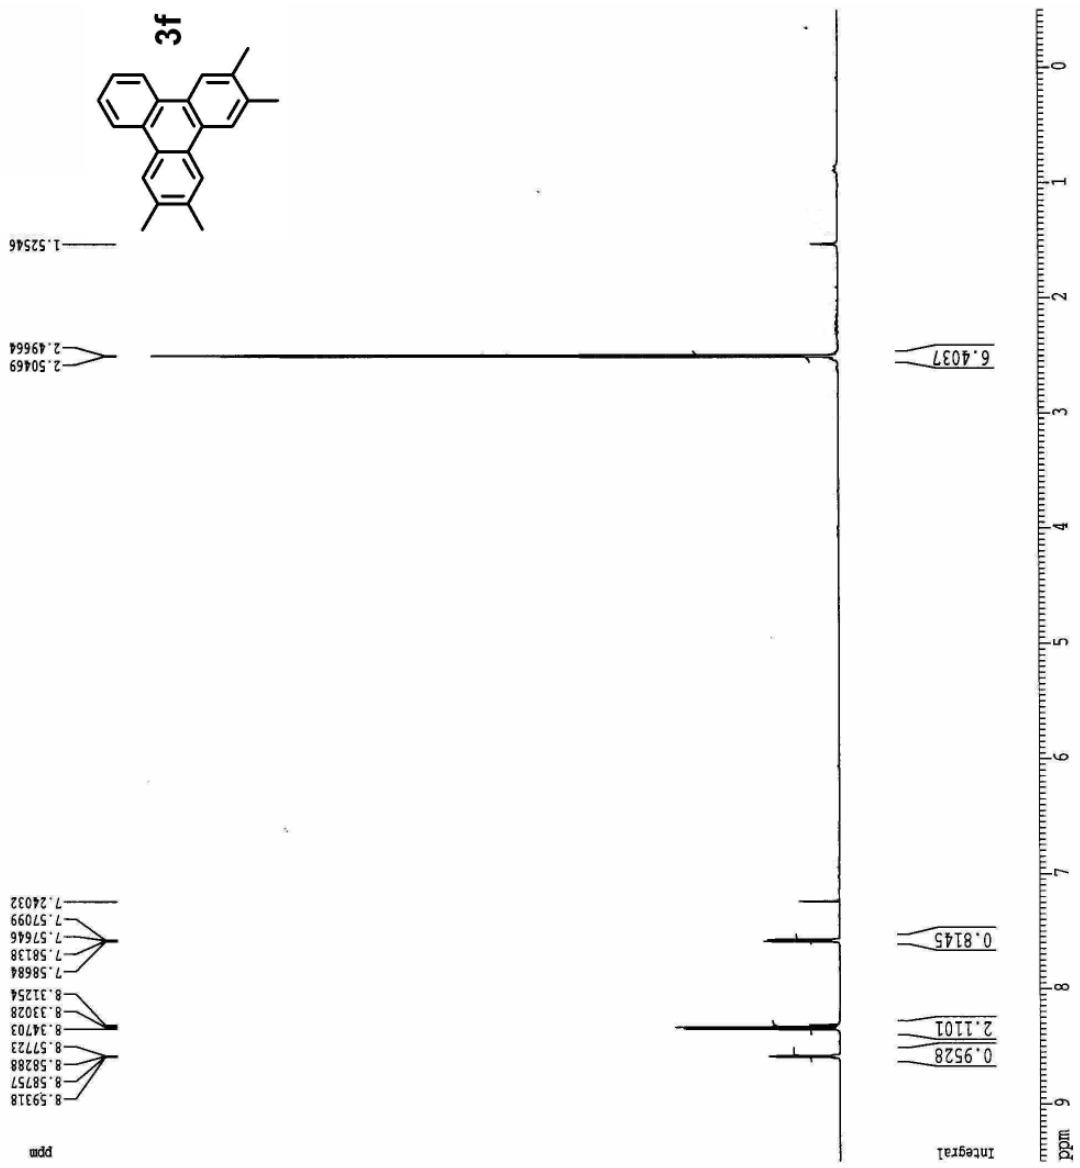

Current Data Parameters  
 NAME J2-110  
 EXNO 1  
 PROCNO 1

F2 - Acquisition Parameters  
 Date\_ 20050901  
 Time 13.02  
 INSTRUM spect  
 PROBHD 5 mm QNP 1H/1  
 PULPROG zg  
 TD 32768  
 SOLVENT CDCl3  
 NS 16  
 DS 0  
 SWH 9615.385 Hz  
 FIDRES 0.293438 Hz  
 AQ 1.7039860 sec  
 RG 32  
 DW 52.000 usec  
 DE 6.50 usec  
 TE 308.1 K  
 D1 1.0000000 sec  
 MCHRG 0.0000000 sec  
 PCW 0.01500000 sec

\*\*\*\*\* CHANNEL f1 \*\*\*\*\*  
 NUC1 1H  
 P1 10.00 usec  
 PL1 4.00 dB  
 SFO1 599.6035976 MHz

F2 - Processing parameters  
 SI 32768  
 SF 599.6000300 MHz  
 WDW no  
 SSB 0  
 LB 0.00 Hz  
 GB 0  
 PC 0.50

1D NMR plot parameters  
 CX 20.00 cm  
 CY 12.00 cm  
 RFL 9.500 ppm  
 F1 5696.20 Hz  
 F2 -0.500 ppm  
 F2P -269.80 Hz  
 F2R 0.50000 ppm/cm  
 F2C 299.80002 Hz/cm



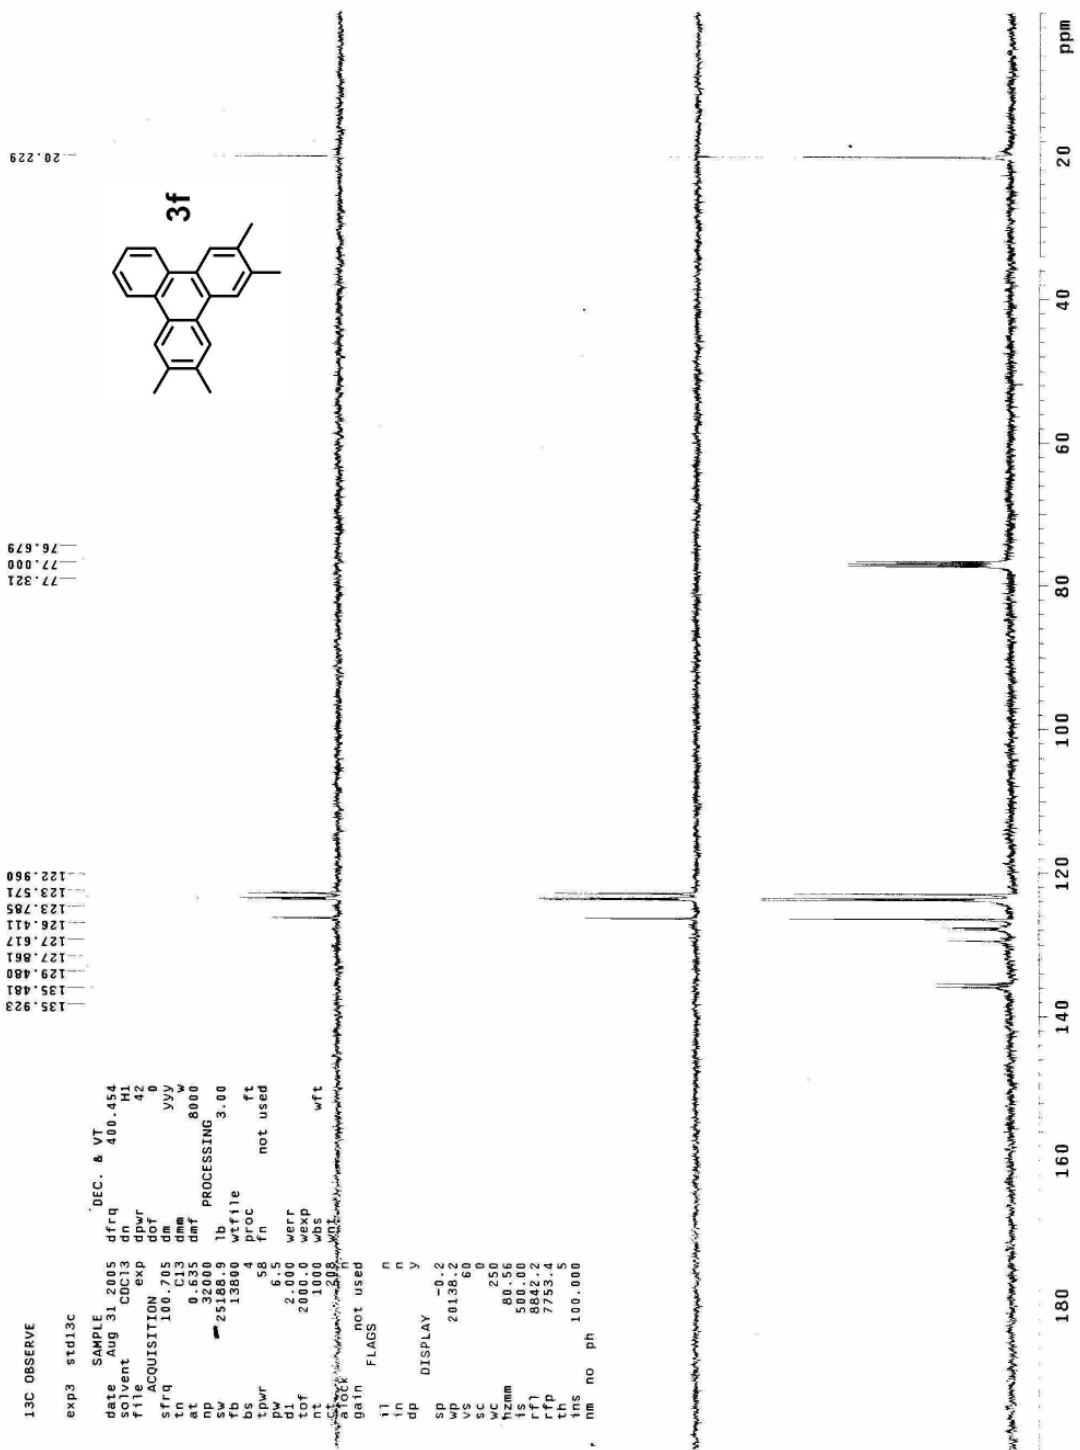

```

13C OBSERVE
exp3 std13c
SAMPLE DEC. & VT
date Aug 31 2005 dfrq 400.454
solvent CDC13 dn H1
file ACQUISITION exp dpar 42
sfrq 100.705 dpr 0
tn C13 dnm yyw
at 0.635 dmf 8000
np 32000 lb PROCESSING 3.00
sw 25188.9 wf file
ts 13800 4 proc ft
tm 8.5 fn not used
d1 2.000 werr
tof 2000.0 wexp
nt 1000 wbs wft
a tof 2000.0 wbs wft
gain not used
fl n
in n
dp DISPLAY y
sp 0.2
vs 20136.66
sc 0
wc 250
hzmm 80.56
fs 500.00
rfi 8642.2
th 7793.5
ins 100.000
, nm no ph

```

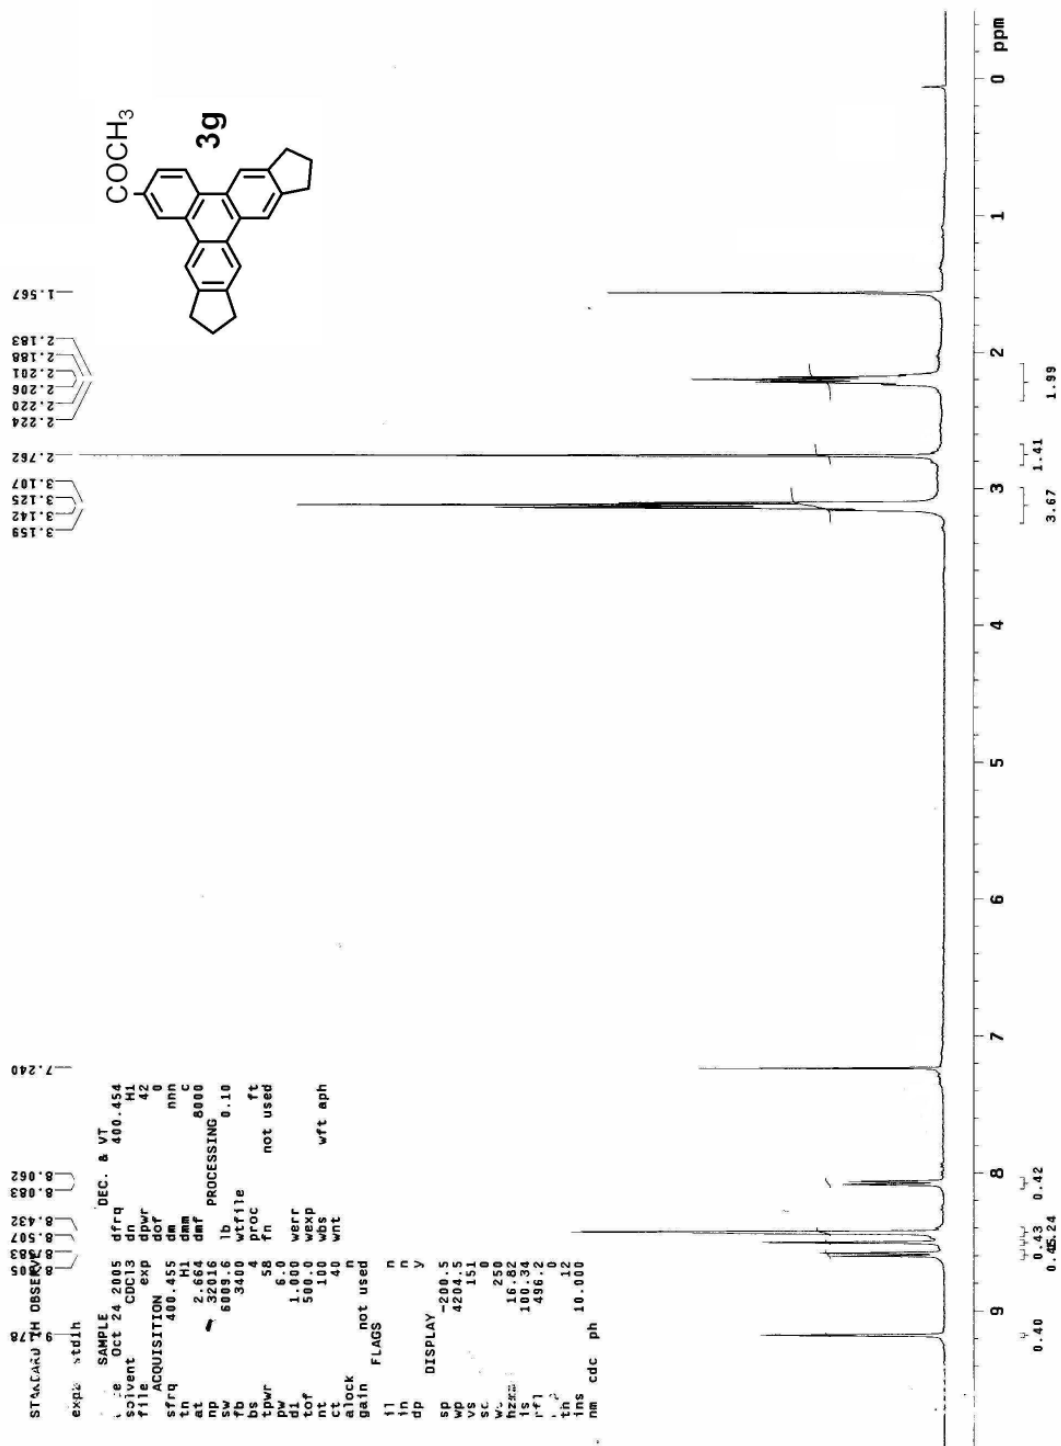

```

Current Data Parameters
NAME      32-164AA
EXPNO     2
PROCNO    1
F2 - Acquisition Parameters
Date_     200713
Time      21.74
INSTRUM   spect
PROBHD    5 mm QNP 1H/1
PULPROG   zgpg
TD         32768
SOLVENT   CDCl3
NS         6
DS         0
SWH        45045.047 Hz
FIDRES    1.374666 Hz
AQ         0.3837748 sec
RG         1024
AQ         1.024 sec
TE         298.5 K
SFO2      598.5028975 MHz
D1         3.00000000 sec
d11        0.03000000 sec
DECTA     2.90000010 sec
ICHSST    0.00000000 sec
PCORR     0.03000000 sec
PCORR2    0.03000000 sec
===== CHANNEL f1 =====
NUC1       13C
P1         4.50 usec
PL1        0.00 dB
SFO1      150.765769 MHz
===== CHANNEL f2 =====
CPDPRG2   waltz16
NUC2       1H
P2         92.00 usec
PL2        120.00 dB
SFO2      500.136420 MHz
===== CHANNEL f3 =====
SFO3      598.5028975 MHz
F2 - Processing parameters
SI         32768
SF         150.7446001 MHz
WDW        EM
SSB        0
LB         3.00 Hz
GB         0
PC         0.50
D0 NMR plot parameters
SI         32768
SF         500.136420 MHz
CY         5.00 cm
FIDF       220.000 ppm
F1         33163.77 Hz
F2F        0.000 ppm
F2         0.00 Hz
F3         11.000 Hz
NUC1       13C
NUC2       1H
NUC3
1658.18815 Hz/cm

```

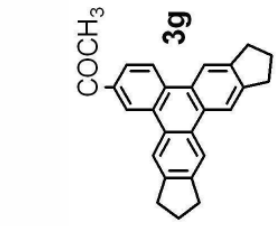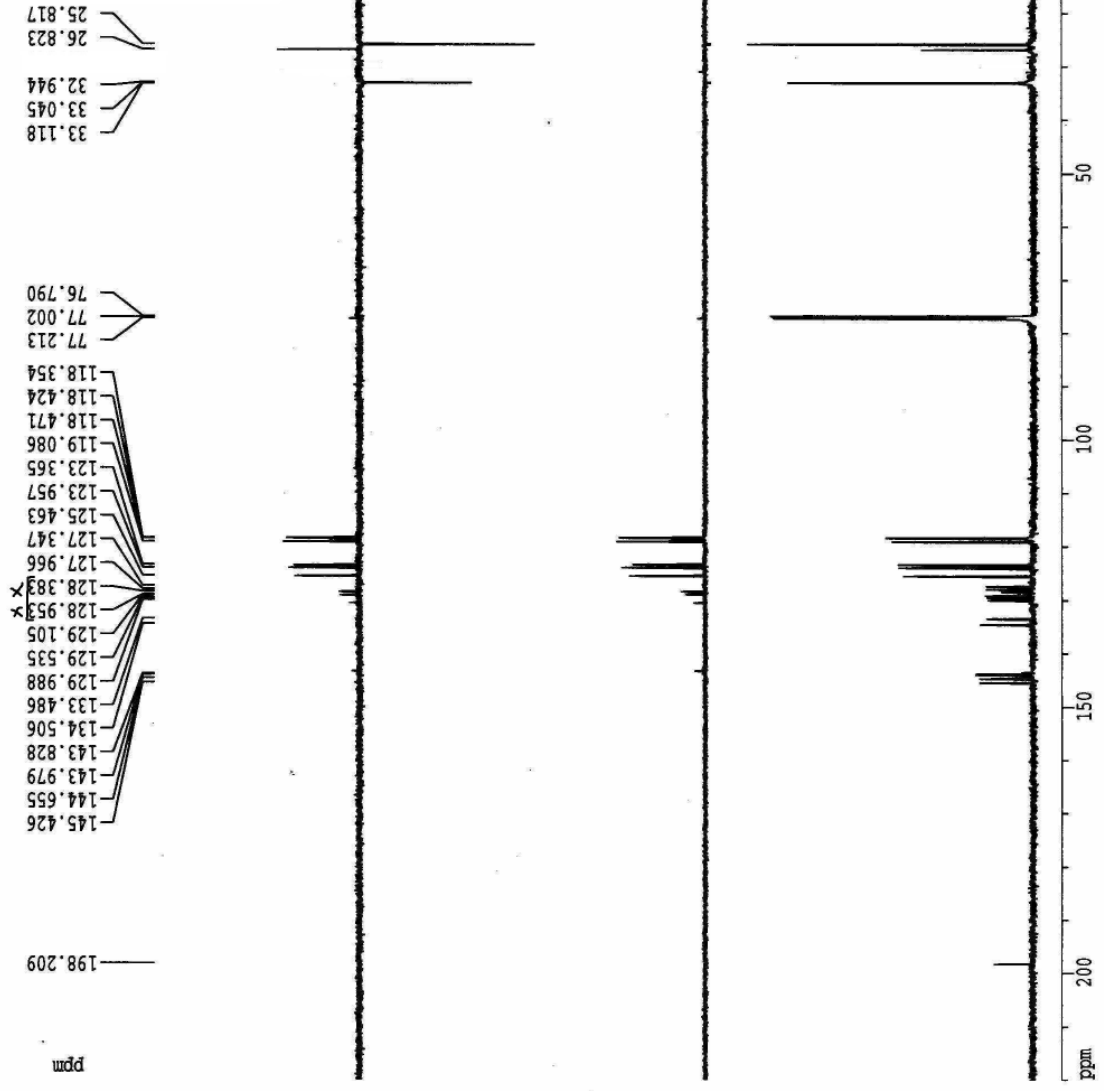

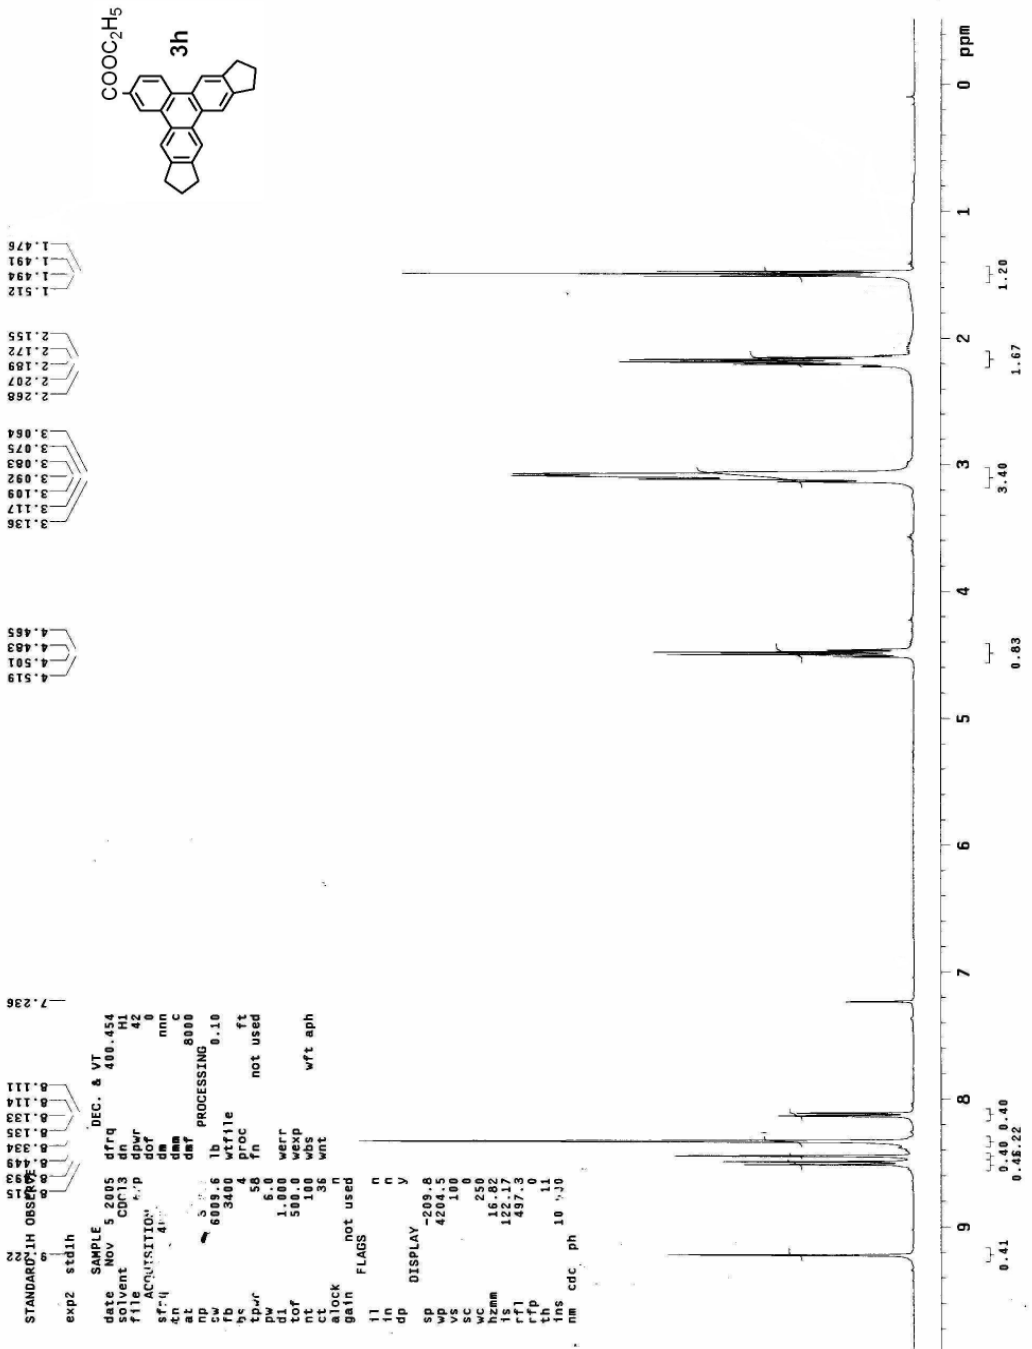

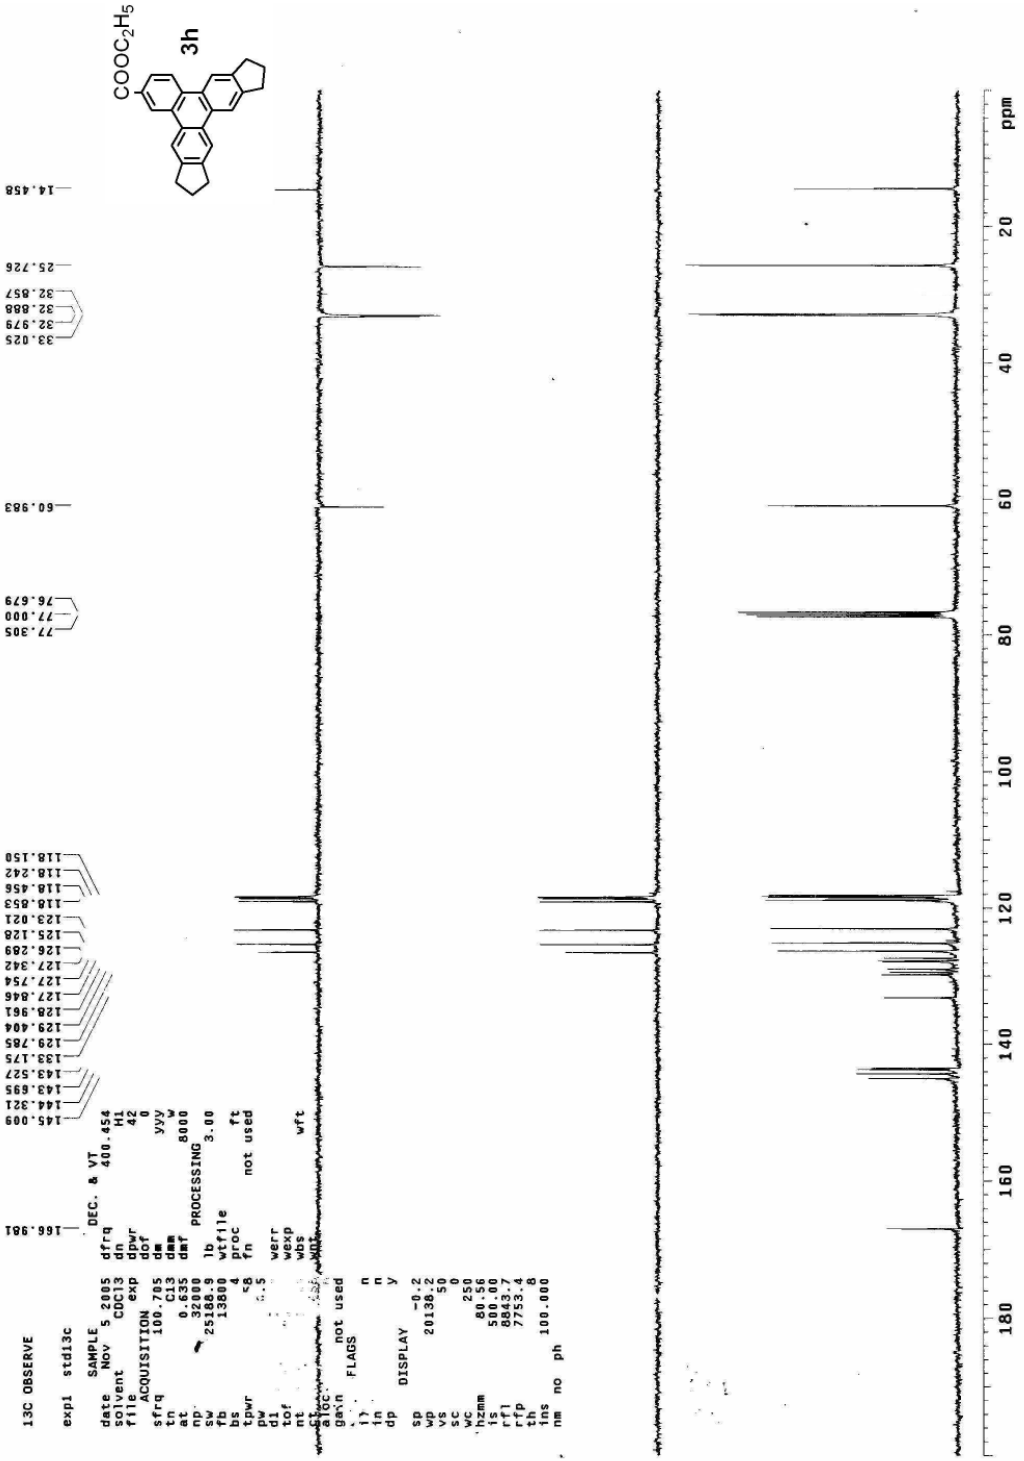

Supplement: b515846j.pdf [file b515846j.pdf]
